# Supplementary material for: Dimerization of the β-Hairpin Membrane-Active Cationic Antimicrobial Peptide Capitellacin from Marine Polychaeta: An NMR Structural and Thermodynamic Study
Source: MDPI journal article supplement (doi:10.3390/biom14030332), 2024-03-11
Supplement: s1 [file s1]

# **Dimerization of the $\beta$ -Hairpin Membrane-Active Cationic Antimicrobial Peptide Capitellacin from Marine Polychaeta: An NMR Structural and Thermodynamic Study**

**Pavel A. Mironov** <sup>1,2</sup>, **Alexander S. Paramonov** <sup>1</sup>, **Olesya V. Reznikova** <sup>1</sup>, **Victoria N. Safronova** <sup>1</sup>, **Pavel V. Panteleev** <sup>1,3</sup>, **Ilia A. Bolosov** <sup>1</sup>, **Tatiana V. Ovchinnikova** <sup>1,3</sup> and **Zakhar O. Shenkarev** <sup>1,3,4,\*</sup>

<sup>1</sup> M.M. Shemyakin & Yu. A. Ovchinnikov Institute of Bioorganic Chemistry, Russian Academy of Sciences, 117997 Moscow, Russia; mironov@nmr.ru (P.A.M.); apar@nmr.ru (A.S.P.); olesya-r@list.ru (O.V.R.); victoria.saf@ibch.ru (V.N.S.); p.v.panteleev@gmail.com (P.V.P.); bolosoff@gmail.com (I.A.B.); ovch@ibch.ru (T.V.O.)

<sup>2</sup> Interdisciplinary Scientific and Educational School of Moscow University "Molecular Technologies of the Living Systems and Synthetic Biology", Faculty of Biology, Lomonosov Moscow State University, 119234 Moscow, Russia

<sup>3</sup> Phystech School of Biological and Medical Physics, Moscow Institute of Physics and Technology (State University), 141701 Dolgoprudny, Russia

<sup>4</sup> International Tomography Center, Siberian Branch of the Russian Academy of Sciences, 630090 Novosibirsk, Russia

\* Correspondence: zakhar-shenkarev@yandex.ru

## Supplementary figures

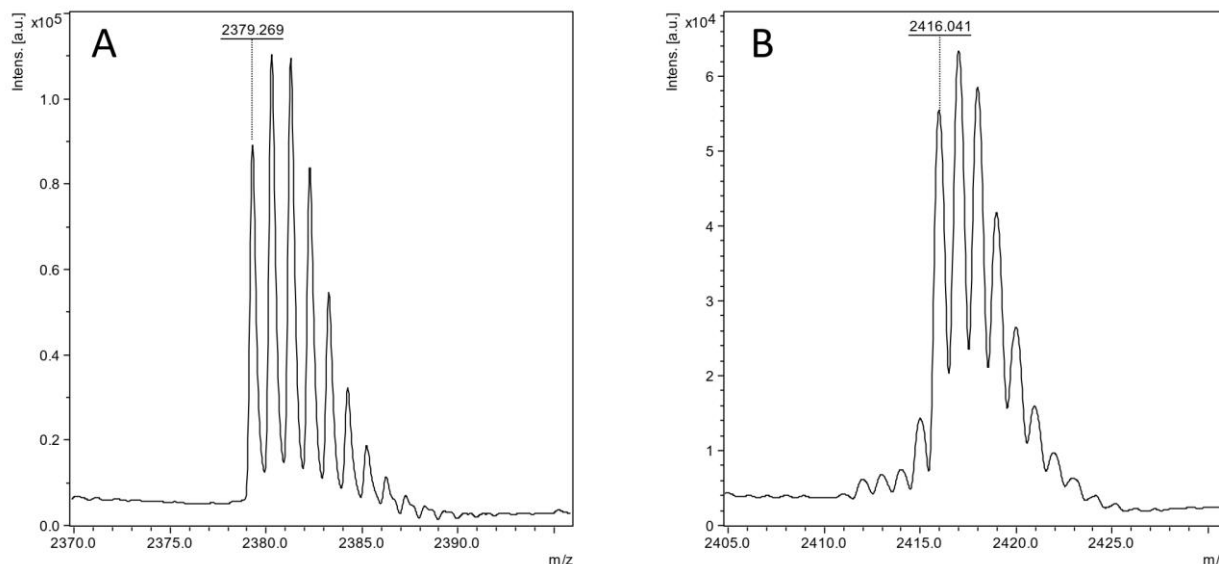

**Figure S1.** MALDI-MS analysis of the recombinant antimicrobial peptides. Molecular masses of  $^{15}\text{N}$ -labeled capitellacin increased by 37 Da (A and B), indicating that all the  $^{14}\text{N}$  atoms were substituted with stable isotopes  $^{15}\text{N}$ . The experimentally measured  $m/z$  value of  $^{15}\text{N}$ -labeled capitellacin matched well the  $[\text{M}+\text{H}]^+$  value of its calculated molecular mass (2416.04 and 2416.16 Da, respectively).

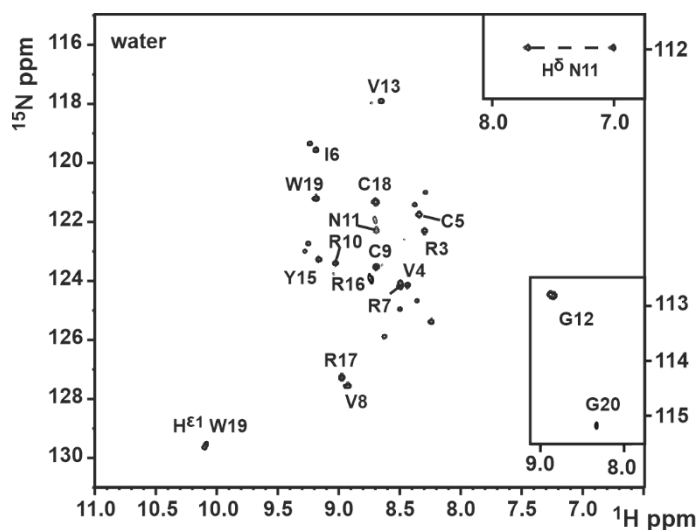

**Figure S2.** 2D sensitivity enhanced  $^1\text{H}$ - $^{15}\text{N}$  HSQC NMR spectrum of  $^{15}\text{N}$ -labeled capitellacin in water (0.07 mM, pH 5.4, 45°C). Additional NMR signals (unassigned) belongs to the *cis*-Ser1-Pro2 isomer of the peptide.

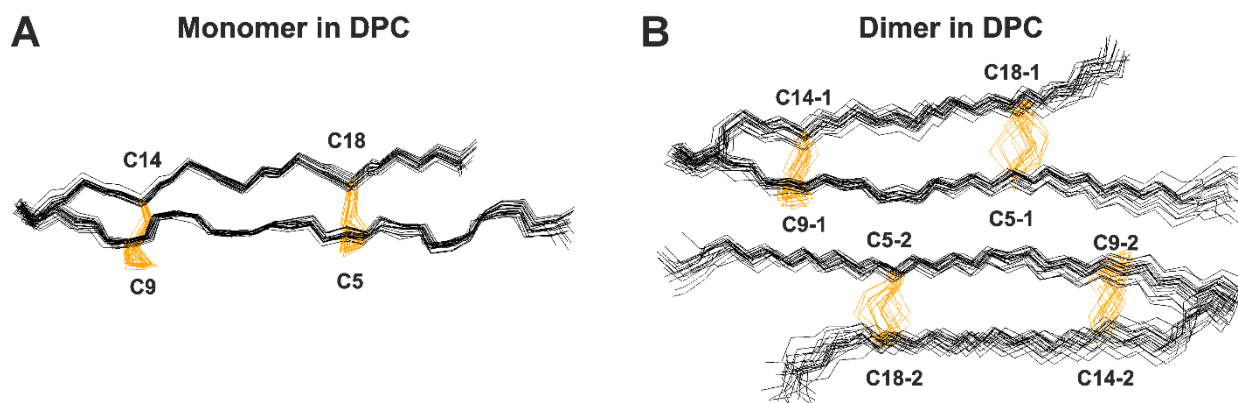

**Figure S3.** Sets of 20 structures calculated for the capitellacin monomer (**A**) and dimer (**B**) in DPC micelles (present work, PDB ID: 8B4R and 8B4S, respectively). Only backbone of the peptide is shown. Disulfide bonds are colored in orange.

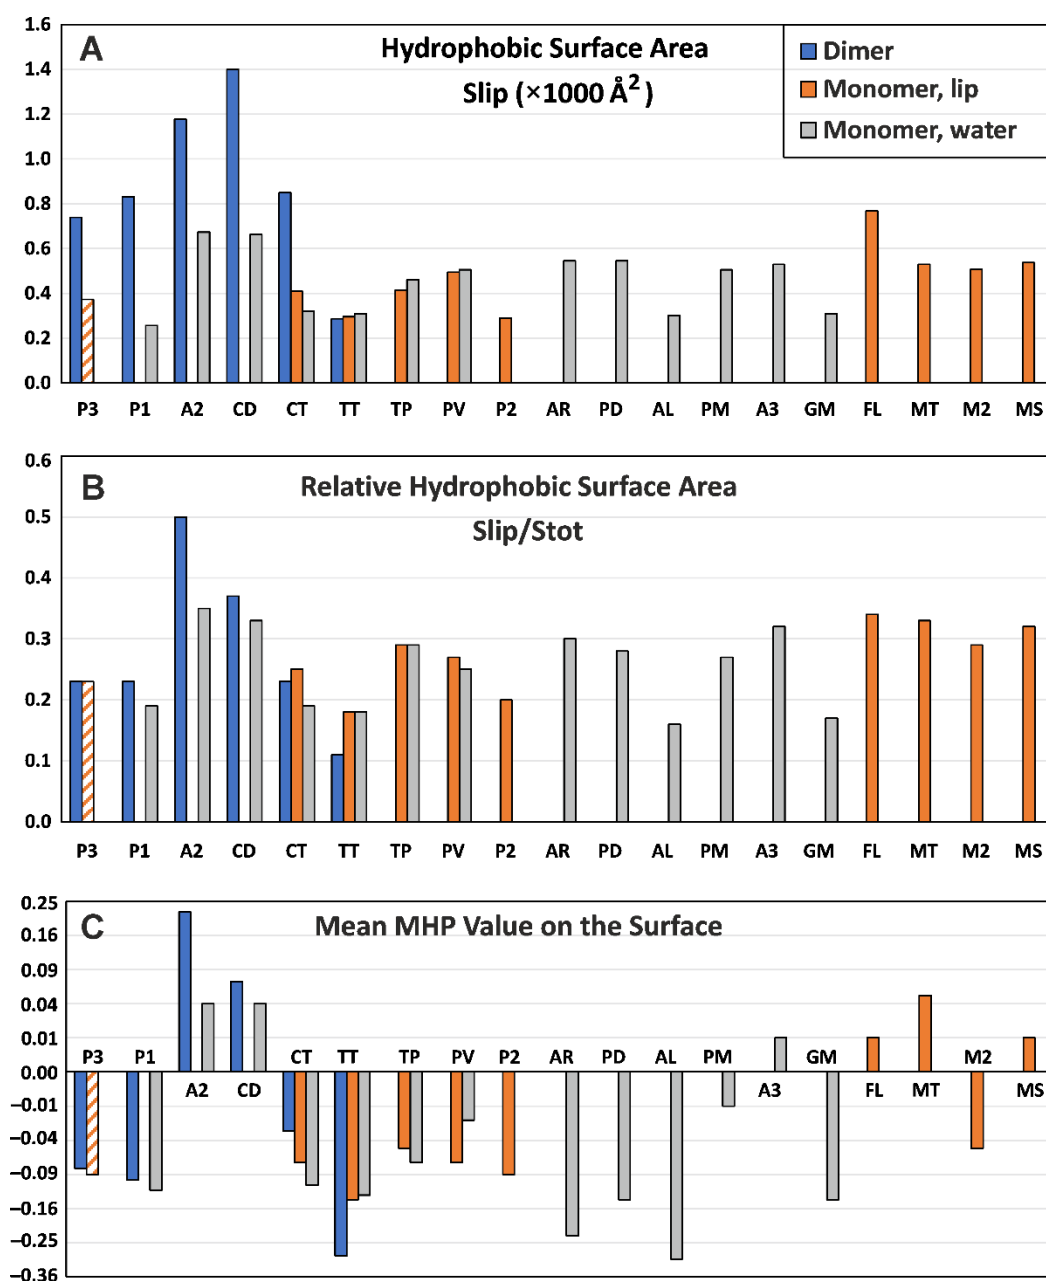

**Figure S4.** Some of the physicochemical properties of the  $\beta$ -hairpin and helical AMPs in monomeric form in water (*gray*), in monomeric form in membrane mimetic (*orange*) and in dimeric form in membrane mimetic (*blue*). **(A)**  $S_{lip}$ , surface area with strong hydrophobicity (where MHP  $> +0.2$ ). **(B)**  $S_{lip}/S_{tot}$ , relative surface area occupied by hydrophobic regions. **(C)** Mean MHP value on the peptide surfaces. Please note the nonlinear vertical scale on the panel (C). The Protegrin-3 monomer (orange hatched bars) was created by splitting NMR structure of Protegrin-3 dimer into two chains. Abbreviations: Protegrin-3 (P3), Protegrin-2 (P2), Protegrin-1 (P1), Arenicin-2 (A2), ChDode (CD), Capitellacin (CT), Thanatin (TT), Tachyplesin I (TP), Arenicin-1 [V8R] (AR), PcDode (PD), Alvinellacin (AL), Polyphemusin I (PM), PV5 (PV), Arenicin-3 (A3), Gomesin (GM), Fowlicidin-1 (FL), Melittin (MT), Magainin-2 (M2), MSI-594 (MS). Full list of the physicochemical properties and references to the peptide structures are shown in Tables S2A-D.

## Supplementary tables

**Table S1.** Statistics for the best CYANA structures of capitellacin monomer and dimer forms in DPC micelles.

|                                              | monomer         | dimer           |
|----------------------------------------------|-----------------|-----------------|
| <b>Distance and angle restraints</b>         |                 |                 |
| Total NOE contacts                           | 131             | 194             |
| Intraresidual                                | 46              | 38              |
| Sequential ( $ i - j  = 1$ )                 | 45              | 86              |
| Medium range ( $1 <  i - j  < 5$ )           | 15              | 24              |
| Long range ( $ i - j  > 5$ )                 | 25              | 36              |
| Intermolecular                               | –               | 10              |
| Hydrogen bond restraints (bonds/upper/lower) | 8/16/16         | 20/40/40        |
| S–S bond restraints (bonds/upper/lower)      | 2/6/6           | 4/12/12         |
| Torsion angle restraints                     | 21              | 46              |
| Angle $\varphi$                              | 14              | 32              |
| Angle $\chi_1$                               | 7               | 14              |
| Total restraints/per residue                 | 196/9.8         | 344/8.6         |
| <b>Statistics for calculated structures</b>  |                 |                 |
| Structures calculated/selected               | 20/200          | 20/200          |
| CYANA target function ( $\text{\AA}^2$ )     | $0.57 \pm 0.07$ | $0.29 \pm 0.05$ |
| Violations of restraints                     |                 |                 |
| Distance ( $> 0.2 \text{ \AA}$ )             | 2               | 0               |
| Distance ( $> 0.4 \text{ \AA}$ )             | 0               | 0               |
| Dihedral angles ( $> 1^\circ$ )              | 0               | 2               |
| r.m.s.d. ( $\text{\AA}$ ) overall            |                 |                 |
| Backbone                                     | $0.19 \pm 0.10$ | $0.28 \pm 0.16$ |
| Heavy atoms                                  | $0.71 \pm 0.11$ | $1.07 \pm 0.21$ |

r.m.s.d. – root mean square deviation.

**Table S2A.** Physicochemical properties of the  $\beta$ -hairpin AMPs in monomeric form in water.

| Peptide                                         | Proteg-<br>rin-1 <sup>a)</sup> | Proteg-<br>rin-2 | Proteg-<br>rin-3 <sup>a)</sup> | Are-<br>nicin-2    | Are-<br>nicin-1<br>[V8R] | Are-<br>nicin-3    | ChDod<br>e <sup>b)</sup> | PcDode<br><sup>c)</sup> | Al-<br>vinella-<br>cin | Capitel-<br>lacin   | Thana-<br>tin       | Tachy-<br>plesin I<br><sup>a)</sup> | Poly-<br>phe-<br>musin I<br><sup>a)</sup> | PV5 <sup>a)</sup>   | Gome-<br>sin <sup>a,c)</sup> |
|-------------------------------------------------|--------------------------------|------------------|--------------------------------|--------------------|--------------------------|--------------------|--------------------------|-------------------------|------------------------|---------------------|---------------------|-------------------------------------|-------------------------------------------|---------------------|------------------------------|
| Short name                                      | P1                             | P2               | P3                             | A2                 | AR                       | A3                 | CD                       | PD                      | AL                     | CT                  | TT                  | TP                                  | PM                                        | PV                  | GM                           |
| PDB ID, refer-<br>ence                          | 1PG1,<br>[29]                  | –                | –                              | 2JNI,<br>[30]      | 5M9U,<br>[21]            | 5V0Y,<br>[31]      | 7ACE,<br>[16]            | 7OSC,<br>[16]           | 2LLR,<br>[33]          | 7ALD,<br>[23]       | 5XO4,<br>[17]       | 1MA2,<br>[18]                       | 1RKK,<br>[32]                             | 1X7K,<br>[19]       | 6MY2,<br>[34]                |
| Mw, Da                                          | 2155.7                         | 1942.4           | 2056.5 <sup>b)</sup>           | 2772.3             | 2815.5                   | 2613.1             | 3007.8                   | 2778.5                  | 2605.1                 | 2379.8              | 2434.0              | 2263.7                              | 2455.9                                    | 2610.2              | 2270.7                       |
| # a.a. res.<br>/ Cys                            | 18/4                           | 16/4             | 18/4                           | 21/2               | 21/2                     | 21/4               | 24/4                     | 24/4                    | 22/4                   | 20/4                | 21/2                | 17/4                                | 18/4                                      | 19/4                | 18/4                         |
| pI                                              | 10.66 <sup>b)</sup>            | 9.88             | 9.88 <sup>b)</sup>             | 10.85              | 11.30                    | 9.25               | 10.41                    | 10.45                   | 10.16                  | 10.41               | 10.47               | 9.93                                | 10.33                                     | 10.83               | 9.93                         |
| GRAVY <sup>d)</sup>                             | –0.25                          | 0.03             | –0.02                          | –0.06              | –0.49                    | –0.05              | 1.00                     | 1.20                    | –0.46                  | –0.22               | –0.90               | –0.52                               | –0.83                                     | –1.03               | –1.06                        |
| Aromaticity                                     | 0.11                           | 0.13             | 0.11                           | 0.24               | 0.24                     | 0.24               | 0.08                     | 0.00                    | 0.09                   | 0.10                | 0.05                | 0.18                                | 0.28                                      | 0.26                | 0.11                         |
| Charge at pH<br>7                               | +7                             | +6               | +6                             | +6                 | +7                       | +4                 | +6                       | +4                      | +6                     | +5                  | +6                  | +7                                  | +8                                        | +9                  | +6                           |
| MHP <sup>e)</sup><br>(mean $\pm$ SD)            | –0.12 $\pm$<br>0.38            |                  |                                | 0.04 $\pm$<br>0.34 | –0.23 $\pm$<br>0.60      | 0.01 $\pm$<br>0.34 | 0.04 $\pm$<br>0.38       | –0.14 $\pm$<br>0.50     | –0.30 $\pm$<br>0.48    | –0.11 $\pm$<br>0.36 | –0.13 $\pm$<br>0.33 | –0.07 $\pm$<br>0.40                 | –0.01 $\pm$<br>0.31                       | –0.02 $\pm$<br>0.32 | –0.14 $\pm$<br>0.32          |
| MHP, Å <sup>2</sup><br>(sum)                    | –167.0                         |                  |                                | 76.2               | –418.9                   | 16.9               | 75.5                     | –276.3                  | –562.6                 | –175.8              | –226.7              | –118.5                              | –22.3                                     | –49.6               | –247.4                       |
| S <sub>tot</sub> , Å <sup>2</sup>               | 1386                           |                  |                                | 1903               | 1800                     | 1646               | 2005                     | 1940                    | 1876                   | 1644                | 1725                | 1600                                | 1875                                      | 2025                | 1790                         |
| S <sub>lip</sub> , Å <sup>2</sup> MHP ><br>+0.2 | 257                            |                  |                                | 673                | 545                      | 529                | 663                      | 545                     | 302                    | 320                 | 309                 | 462                                 | 505                                       | 505                 | 310                          |
| S <sub>hyd</sub> , Å <sup>2</sup> MHP <<br>–0.2 | 611                            |                  |                                | 507                | 845                      | 470                | 561                      | 771                     | 1050                   | 700                 | 741                 | 643                                 | 584                                       | 634                 | 879                          |
| S <sub>lip</sub> / S <sub>tot</sub>             | 0.19                           |                  |                                | 0.35               | 0.30                     | 0.32               | 0.33                     | 0.28                    | 0.16                   | 0.19                | 0.18                | 0.29                                | 0.27                                      | 0.25                | 0.17                         |

a) Calculated mass and charge take into account, and pI and GRAVY values do not take into account the C-terminal amidation.

b) Parameters are given for covalent dimer of ChDode.

c) Calculated mass and charge take into account, and pI and GRAVY values do not take into account interconversion of N-terminal Gln residue into cyclic pyroglutamate.

d) Average hydrophobicity index calculated according to Kyte and Doolittle hydrophobicity scale [25]. The maximum and minimum values of this index are +4.5 and –4.5 for poly-Ile and poly-Arg sequences, respectively.

e) Following values were calculated in the PLATINUM software [24] for the first structures from the NMR ensembles. MHP – the value of molecular hydrophobicity potential on the molecule surface. The maximal MHP values are approximately  $-2.0$  (polar) and  $+2.0$  (hydrophobic).  $S_{\text{tot}}$ ,  $S_{\text{lip}}$ , and  $S_{\text{hyd}}$  – total, lipophilic (hydrophobic, where  $\text{MHP} > +0.2$ ), and hydrophilic ( $\text{MHP} < -0.2$ ) surface areas.

**Table S2B.** Surface hydrophobicity of the  $\beta$ -hairpin AMPs in monomeric form in DPC micelles.

|                                                  | Capitellacin     | Thanatin         | Tachyplesin I    | PV5              | Protegrin-2      | Protegrin-3 chainA <sup>†</sup> |
|--------------------------------------------------|------------------|------------------|------------------|------------------|------------------|---------------------------------|
| PDB ID, reference                                | 8B4R             | 6AAB, [22]       | 1MA5, [18]       | 2B5K, [19]       | 2MUH, [20]       | 1ZY6, [13]                      |
| MHP (mean $\pm$ SD) <sup>e)</sup>                | $-0.07 \pm 0.37$ | $-0.14 \pm 0.35$ | $-0.05 \pm 0.36$ | $-0.07 \pm 0.37$ | $-0.09 \pm 0.35$ | $-0.09 \pm 0.35$                |
| MHP (sum), $\text{\AA}^2$                        | -118.1           | -239.4           | -76.6            | -136.4           | -129.2           | -142.2                          |
| $S_{\text{tot}}$ , $\text{\AA}^2$                | 1665             | 1662             | 1413             | 1842             | 1429             | 1632                            |
| $S_{\text{lip}}$ (MHP $> +0.2$ ), $\text{\AA}^2$ | 409              | 296              | 415              | 494              | 290              | 373                             |
| $S_{\text{hyd}}$ (MHP $< -0.2$ ), $\text{\AA}^2$ | 632              | 735              | 547              | 802              | 499              | 713                             |
| $S_{\text{lip}} / S_{\text{tot}}$                | 0.25             | 0.18             | 0.29             | 0.27             | 0.20             | 0.23                            |

f) Following values were calculated for the first chain from the first Protegrin-3 structure from the NMR ensemble.

**Table S2C.** Surface hydrophobicity of the  $\beta$ -hairpin AMPs in dimeric form in various membrane mimetics.

|                                               | Protegrin-1      | Protegrin-3      | Arenicin-2       | ChDode tetramer | Capitellacin     | Thanatin         |
|-----------------------------------------------|------------------|------------------|------------------|-----------------|------------------|------------------|
| Membrane mimetic                              | POPC             | DPC              | DPC              | DPC             | DPC              | LPS              |
| Type of dimer                                 | Asymm.<br>NC↑↑CN | Symm.<br>NC↑↓CN  | Asymm.<br>CN↑↑NC | Symm.<br>↑↓↑↓   | Symm.<br>CN↑↓NC  | Symm.<br>CN↑↓NC  |
| PDB ID, reference                             | 1ZY6, [14]       | 2MZ6, [13]       | 2L8X, [15]       | 7ACB, [16]      | 8B4S             | 5XO9, [17]       |
| MHP (mean $\pm$ SD) <sup>e)</sup>             | $-0.10 \pm 0.37$ | $-0.08 \pm 0.35$ | $0.22 \pm 0.29$  | $0.07 \pm 0.40$ | $-0.03 \pm 0.38$ | $-0.29 \pm 0.41$ |
| MHP (sum), Å <sup>2</sup>                     | -324.2           | -252.6           | 743.6            | 252.9           | -102.0           | -746.9           |
| $S_{\text{tot}}$ , Å <sup>2</sup>             | 3272             | 3095             | 3437             | 3841            | 3164             | 2590             |
| $S_{\text{lip}}$ (MHP > +0.2), Å <sup>2</sup> | 761              | 727              | 1702             | 1440            | 731              | 287              |
| $S_{\text{hyd}}$ (MHP < -0.2), Å <sup>2</sup> | 1454             | 1331             | 214              | 977             | 1063             | 1471             |
| $S_{\text{lip}} / S_{\text{tot}}$             | 0.23             | 0.23             | 0.50             | 0.37            | 0.23             | 0.11             |



**Table S2D.** Physicochemical properties of the  $\alpha$ -helical AMPs in monomeric form.

|                                               | <b>Fowlicidin-1</b> | <b>Melittin <sup>a)</sup></b> | <b>Magainin-2 <sup>a)</sup></b> | <b>MSI-594</b>  |
|-----------------------------------------------|---------------------|-------------------------------|---------------------------------|-----------------|
| Short name                                    | <b>FL</b>           | <b>MT</b>                     | <b>M2</b>                       | <b>MS</b>       |
| Environment                                   | Water/TFE 1:1       | Crystal                       | DPC                             | LPS             |
| PDB ID, reference                             | 2AMN, [35]          | 2MLT, [36]                    | 2MAG, [37]                      | 2K98, [38]      |
| Mw, Da                                        | 3141.9              | 2846.5                        | 2465.9                          | 2441.1          |
| # a.a. res.                                   | 26                  | 26                            | 23                              | 24              |
| pI                                            | 11.60               | 12.02                         | 10.00                           | 10.70           |
| GRAVY <sup>d)</sup>                           | −0.07               | 0.27                          | 0.08                            | 0.51            |
| Aromaticity                                   | 0.12                | 0.04                          | 0.13                            | 0.04            |
| Charge at pH 7                                | +8                  | +6                            | +4                              | +6              |
| MHP (mean $\pm$ SD) <sup>e)</sup>             | 0.01 $\pm$ 0.40     | 0.05 $\pm$ 0.40               | −0.05 $\pm$ 0.38                | 0.01 $\pm$ 0.44 |
| MHP (sum)                                     | 30.4                | 86.2                          | −86.4                           | 22.1            |
| $S_{\text{tot}}$ , Å <sup>2</sup>             | 2272                | 1609                          | 1749                            | 1702            |
| $S_{\text{lip}}$ (MHP > +0.2), Å <sup>2</sup> | 768                 | 529                           | 507                             | 537             |
| $S_{\text{hyd}}$ (MHP < −0.2), Å <sup>2</sup> | 691                 | 464                           | 664                             | 594             |
| $S_{\text{lip}} / S_{\text{tot}}$             | 0.34                | 0.33                          | 0.29                            | 0.32            |
